# Supplementary material for: Intragallbladder versus intravenous indocyanine green (ICG) injection for enhanced bile duct visualization by fluorescent cholangiography during laparoscopic cholecystectomy: a retrospective cohort study
Source: PubMed Central journal article supplement — Gland Surg. 2024 Sep 27;13(9):1628–38. doi: 10.21037/gs-24-198 (PMC11480876; doi:10.21037/gs-24-198), 2024-09-27
Supplement: gs-13-09-1628-dss.pdf [file gs-13-09-1628-dss.pdf]

## Data Sharing Statement

|                     |                                                                                                                                                     |                                                                                                                  |
|---------------------|-----------------------------------------------------------------------------------------------------------------------------------------------------|------------------------------------------------------------------------------------------------------------------|
| <b>Article Info</b> | <a href="https://dx.doi.org/10.21037/gc-24-198">https://dx.doi.org/10.21037/gc-24-198</a>                                                           |                                                                                                                  |
| <b>Item</b>         | <b>Question</b>                                                                                                                                     | <b>Authors' Response<br/>(place "-" if not applicable)</b>                                                       |
| 1                   | Would you like to share data collected for your study to others?                                                                                    | Yes.                                                                                                             |
| 2                   | If not, would you like to share the reason for your decision?                                                                                       | -                                                                                                                |
| 3                   | What data in particular will be shared?                                                                                                             | Patient clinical data, excluding video data.                                                                     |
| 4                   | Any other documents will be shared? Such as study protocol, statistical analysis plan, informed consent form, clinical study report, analytic code. | Study protocol, statistical analysis plan.                                                                       |
| 5                   | When will data availability begin?                                                                                                                  | From the publication date.                                                                                       |
| 6                   | When will data availability end?                                                                                                                    | Two years within the publication date.                                                                           |
| 7                   | To whom will you share the data?                                                                                                                    | Surgeons.                                                                                                        |
| 8                   | For what type of analysis or purpose?                                                                                                               | Analysis of ICG combined with near infrared fluorescence in cholecystectomy.                                     |
| 9                   | How or where can the data/documents be obtained?                                                                                                    | z745151058@163.com                                                                                               |
| 10                  | Any other restrictions?                                                                                                                             | We may balance the potential benefits and risks for each request and then provide the data that could be shared. |
