# Supplementary material for: Intragallbladder versus intravenous indocyanine green (ICG) injection for enhanced bile duct visualization by fluorescent cholangiography during laparoscopic cholecystectomy: a retrospective cohort study
Source: PubMed Central journal article supplement — Gland Surg. 2024 Sep 27;13(9):1628–38. doi: 10.21037/gs-24-198 (PMC11480876; doi:10.21037/gs-24-198), 2024-09-27
Supplement: gs-13-09-1628-supplementary.pdf [file gs-13-09-1628-supplementary.pdf]

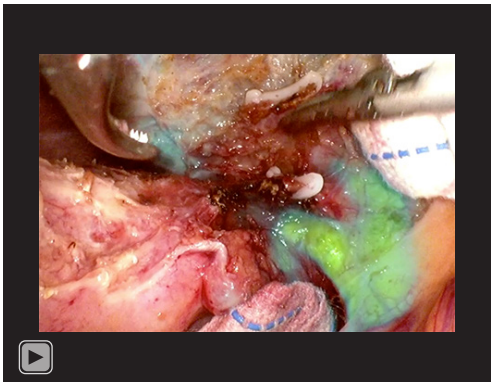

**Video S1** Fluorescent cholangiography of extrahepatic biliary system following intravenous ICG injection, 90 s, 73 MB. The patient was a 55-year-old man with a gallbladder polyp. He was injected with 10 mg of ICG via the peripheral vein 10 h prior to surgery. Before LC, his total serum bilirubin was 11.3  $\mu\text{mol/L}$ . The operative time was 61 min, and the blood loss was 15 mL. His postoperative course was uneventful.

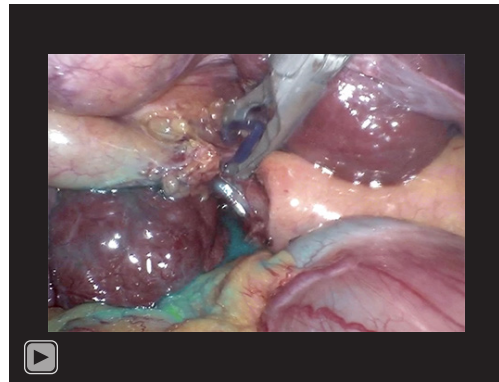

**Video S2** Fluorescent cholangiography of extrahepatic biliary system following intragallbladder ICG injection, 51 s, 40.6 MB. The patient was a 62-year-old male with a solitary gallbladder stone combined with liver cirrhosis. Intraoperatively, 4 mL of saline containing 10 mg of ICG was injected through the gallbladder. Before cholecystectomy, his serum total bilirubin was 21.0  $\mu\text{mol/L}$ . The operative time was 72 min, and the blood loss was 20 mL. Postoperative recovery was uneventful.
